# Supplementary material
Source: Springer Nature journal article supplement (https://www.springermedizin.de/resource/supplementary/12960_2009_225_MOESM2_ESM.pdf/9570682)
Supplement: MOESM2 [file 9570682]

### Source/bases

### Inputs:

### Outputs:

Expenditure analysis of initial training/course curricula

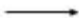

Cost of initial training per student/course

**X**

=

Cost of initial training

Objectives: Initial training

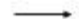

Number of students

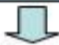

+

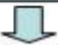

Objectives: Personnel

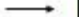

Number of personnel

**X**

+

Salaries Policy

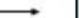

Monetary value of salaries and allowances per worker

+

=

Wage bill

+

Incentives Policy

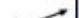

Number of beneficiaries

**X**

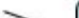

Monetary value of incentive package per worker

=

Cost of incentives package
